1 **Title:** A critical role for Musashi in photoreceptor morphogenesis and Vision

2 **Abbreviated title:** Musashi in photoreceptors

3 **Authors:** Jesse Sundar<sup>1\*</sup>, Fatimah Matakah<sup>1\*</sup>, Bohye Jeong<sup>1</sup>, Peter Stoilov<sup>1</sup>, and Visvanathan

4 Ramamurthy<sup>1,2,3</sup>

5 **Affiliations:** Departments of Biochemistry<sup>1</sup>, Ophthalmology and Visual Sciences<sup>2</sup>, and Neuroscience<sup>3</sup>;

6 Robert C. Byrd Health Sciences Center, West Virginia University; Morgantown, West Virginia, USA,

7 26505;

8

9 \*Jesse Sundar and Fatimah Matakah contributed equally to this work.

10

11 **Address for correspondence:**

12 Peter Stoilov, Department of Biochemistry, West Virginia University School of Medicine; 1

13 Medical Center Dr. Morgantown, WV, USA, 26505; Email: [pstoilov@hsc.wvu.edu](mailto:pstoilov@hsc.wvu.edu); Telephone: 304-293-

14 6334; Fax: 304-293-6846;

15 Visvanathan Ramamurthy, Department of Biochemistry, West Virginia University School of

16 Medicine; 1 Medical Center Dr. Morgantown, WV, USA, 26505; Email: [ramamurthyv@hsc.wvu.edu](mailto:ramamurthyv@hsc.wvu.edu);

17 Telephone: 304-293-2479; Fax: 304-293-6846;

18

19

20 **Conflict of interest statement:** The authors declare no conflicts of interest.

21 **Acknowledgments:** The authors thank Maxim Sokolov, John Hollander, Ronald Gross for their feedback

22 on the work. We also thank Dr. Christopher Lengner for the generous donation of the *Msi1<sup>fl/fl</sup> Msi2<sup>fl/fl</sup>*

23 mice and Dr. Andrew Goldberg for PRPH2 antibody.

24 **Keywords:** Msi1, Msi2, Musashi, Retina, Photoreceptor, RNA-binding protein, Splicing.

25

26

27

28 **ABSTRACT**

29 Musashi family of RNA-binding proteins are known for their role in stem-cell renewal and are  
30 negative regulators of cell differentiation. Interestingly, in the retina, Musashi proteins, MSI1 and MSI2  
31 are differentially expressed throughout the cycle of retinal development including robust expression in the  
32 adult retinal tissue. To study the role of Musashi proteins in the retina, we generated a pan-retinal and rod  
33 photoreceptor neuron specific conditional knockout mouse lacking MSI1 and MSI2. Independent of sex,  
34 photoreceptor neurons with simultaneous deletion of *Msi1* and *Msi2* were unable to respond to light and  
35 displayed severely disrupted OS morphology and ciliary defects. The retina lacking Musashi exhibited  
36 neuronal degeneration with complete loss of photoreceptors by six months. In concordance with our  
37 earlier studies that proposed a role for Musashi in regulating alternative splicing, the loss of Musashi  
38 prevented the use of photoreceptor-specific exons in transcripts critical for OS morphogenesis,  
39 ciliogenesis and synaptic transmission. Overall, we demonstrate a critical role for Musashi in the  
40 morphogenesis of terminally differentiated photoreceptor neurons. This role is in stark contrast with the  
41 canonical function of these two proteins in maintenance and renewal of stem cells.

42

43

## 44 INTRODUCTION

45 In eukaryotes, alternative splicing of pre-mRNA increases protein diversity and controls gene  
46 expression. Diversification of proteomes through alternative splicing is a defining characteristic of  
47 metazoans and was expanded dramatically in bilaterians (1). Alternative splicing is prevalent in vertebrate  
48 neurons and is critical for the development and function of vertebrate nervous systems (2–7).

49 We previously showed that photoreceptor neurons exploit a unique splicing program (8). Motif  
50 enrichment analysis suggested that Musashi-1 (MSI1) and Musashi-2 (MSI2) promote the use of  
51 photoreceptor specific exons (8). We further showed that MSI1 is critical for utilization of photoreceptor  
52 specific exon in the *Ttc8* gene (8). In addition, Musashi promotes the splicing of several photoreceptor  
53 specific exons when over-expressed in cultured cells (8). Recently, analysis of a comprehensive gene  
54 expression data set demonstrated that photoreceptors utilize a unique set of alternative exons that are  
55 primarily regulated by MSI1 and MSI2 (9).

56 The MSI1 and MSI2 proteins have two highly conserved RNA binding domains (RBDs) in the N-  
57 terminal region which show close to 90% sequence identity and recognize a similar UAG motif in RNA  
58 (10). The two RBDs of MSI1 and MSI2 are followed by a less conserved C-terminal region which shows  
59 approximately 70% sequence identity (11). The high degree of sequence identity between the MSI1 and  
60 MSI2 results in functional redundancy between the two proteins (12, 13).

61 Vertebrate photoreceptors are neurons specialized in detecting and transducing light stimuli.  
62 Photoreceptors are characterized by segmented morphology which compartmentalizes phototransduction,  
63 core cellular functions, and synaptic transmission. The light sensing machinery is confined to the outer  
64 segment, a stack of membranes that is elaborated by cell's modified primary cilium. The outer segment is  
65 dynamic structure that is remade every 7 to 10 days. Consequently, maintenance of the outer segment  
66 requires high rate of transport of membranes and proteins through the connecting cilium (14).

67 The predicted splicing targets of Musashi in photoreceptors include pre-mRNAs from ciliary  
68 (*Ttc8*, *Cep290*, *Cc2d2a*, *Prom1*) and synaptic-associated genes (*Cacna2d4*, *Slc17a7*) (15–21). These  
69 genes are crucial for photoreceptor development and function (15–21). We proposed that production of

70 photoreceptor specific splicing isoforms that is promoted by Musashi is necessary for the development  
71 and maintenance of photoreceptor cells *in vivo* (8).

72 To test if Musashi drives photoreceptor development and function, we removed *Msi1* and *Msi2* in  
73 the developing retina and rod photoreceptor cells. We find that Musashi proteins are essential for  
74 photoreceptor function, morphogenesis, and survival but not their specification. Specifically, the Musashi  
75 proteins are crucial for outer segment (OS) and axoneme development. As expected, disruption of the  
76 Musashi genes led to loss of expression of photoreceptor specific splicing isoforms.

77

78

## 79 MATERIALS AND METHODS

### 80 Generation of mice and genotyping

81 Mice carrying floxed alleles for *Msi1* and *Msi2* were provided by Dr. Christopher Lengner from  
82 the University of Pennsylvania. *Six3-Cre* transgene or *Nrl-Cre* transgenes were used to delete the floxed  
83 alleles in the developing retina or rod photoreceptors (Stock Nos. 019755, 028941, Jax labs). All mouse  
84 lines in this study are in C57 Black6/J background (<https://www.jax.org/strain/000664>) and were devoid  
85 of naturally occurring *rd1* and *rd8* alleles (22, 23). Males hemizygous for the *Six3-Cre* transgene or *Nrl-*  
86 *Cre* transgene and floxed for either *Msi1*, *Msi2*, or both *Msi1* and *Msi2* were mated with females floxed  
87 for either *Msi1*, *Msi2*, or both *Msi1* and *Msi2* to obtain experimental knockout mice and littermate control.  
88 The offspring of breeding pairs were genotyped using PCR from ear biopsies. The *Msi1* wildtype and  
89 floxed alleles were identified using following primers: (5'-CGG ACT GGG AGA GGT TTC TT-3' and  
90 5'-AGC TCC CCT GAT TCC TGG T-3'). The *Msi2* wildtype and floxed alleles were identified by using  
91 following primers: (5'-GCT CGG CTG ACA AAG AAA GT-3' and 5'-TCT CCT TGT TGC GCT CAG  
92 TA-3'). The presence of the *Six3 Cre*, *Nrl Cre* transgene and *Cre recombinase* were determined using  
93 following primers respectively: (5'-CCC AAA TGT TGC TGG ATA GT-3' and 5'-CCC TCT CCT CTC  
94 CCT CCT-3'), (5'-TTT CAC TGG CTT CTG AGT CC-3' and 5'-CTT CAG GTT CTG CGG GAA AC-  
95 3') and (5'-CCT GGA AAA TGC TTC TGT CCG-3' and 5'-CAG GGT GTT ATA AGC AAT CCC-3').

96 All experiments were conducted with the approval of the Institutional Animal Care and Use  
97 Committee at West Virginia University. All experiments were carried out with adherence to the principles  
98 set forth in the ARVO Statement for the Ethical Use of Animals in Ophthalmic and Vision Research  
99 which advocates the use of the minimum number of animals per study needed to obtain statistical  
100 significance.

### 101 Electrorretinography, Immunoblotting, and Reverse Transcriptase PCR

102 Electrorretinography, immunoblotting, and reverse transcriptase PCR were conducted using  
103 previously described protocol from our laboratory (8, 24, 25).

### 104 Immunofluorescence Microscopy

105 Immunofluorescence microscopy was carried out using a modified procedure in our  
106 laboratory(24, 25). Briefly, eyes were enucleated, and the cornea and lens were discarded. After  
107 dissection, eyes were fixed by immersion in 4% paraformaldehyde in PBS for one hour. After washing  
108 the eyes in PBS three times for ten minutes each, they were dehydrated by overnight incubation in 30%  
109 sucrose in PBS. Eyes were then incubated in a 1:1 solution of OCT:30% sucrose in PBS for one hour and  
110 frozen in OCT (VWR). The frozen tissues were sectioned using a Leica CM1850 cryostat for collecting  
111 serial retinal sections of 16µm thickness. The retinal cross-sections were then mounted onto Superfrost  
112 Plus microscope slides (Fisher Scientific). Slide sections were then washed and permeabilized with PBS  
113 supplemented with 0.1% Triton X-100 (PBST) and incubated for one hour in a blocking buffer containing  
114 10% goat serum, 0.3% Triton X-100, and 0.02% sodium azide in PBS. Retinal sections were then  
115 incubated with primary antibody in a dilution buffer containing 5% goat serum, 0.3% Triton X-100,  
116 0.02% sodium azide, and primary antibody at 1:500 dilution in PBS overnight at 4°C followed by three 5-  
117 minute washes using PBST. Sections were then incubated in the same dilution buffer containing  
118 secondary antibody and DAPI at 1:1000 for one hour. Slides were washed with PBST three times for five  
119 minutes each before treating with Prolong Gold Antifade reagent (ThermoFisher) and securing the  
120 coverslip. The images were collected using a Nikon C2 Confocal Microscope.

### 121 **Retinal histology of the mouse models**

122 Following euthanasia, eyes were enucleated using C-shaped forceps after marking the superior  
123 pole and incubated in Z-fixative for >48 hours before shipment and tissue processing by Excalibur  
124 Pathology Inc. (Norman, OK). The embedding, serial sectioning, mounting, and hematoxylin/eosin  
125 (H&E) staining were performed by Excalibur Pathology. A Nikon C2 Microscope equipped with  
126 Elements software was used to image the slides.

### 127 **Transmission Electron Microscopy**

128 After euthanasia, a C-shaped forceps was used to enucleate the eye, and the cornea was discarded  
129 (24, 25). Eyes were then incubated in a fixative solution containing 2.5% glutaraldehyde and 2%  
130 paraformaldehyde in 100mM sodium cacodylate buffer at pH 7.5 for 45 minutes before removal of the

131 lens. After lensectomy, eyes were placed back into fixative for 72 hours before shipment, tissue  
132 processing, and imaging at the Robert P. Apkarian Integrated Electron Microscopy Core at Emory  
133 University.

#### 134 **Antibodies and stains**

135 The following primary antibodies were used throughout our studies: rat anti-MSI1 (1:1000; MBL  
136 International Cat# D270-3, RRID:AB\_1953023), rabbit anti-MSI2 (1:2000; Abcam Cat# ab76148,  
137 RRID:AB\_1523981), mouse anti- $\alpha$ -tubulin (1:10 000; Sigma-Aldrich Cat# T8328, RRID:AB\_1844090),  
138 rhodamine peanut agglutinin (1:1000; Vector Laboratories Cat# RL-1072, RRID:AB\_2336642), rabbit  
139 anti-peripherin-2 (1:2000) was a kind gift by Dr. Andrew Goldberg from Oakland University, rabbit anti-  
140 PDE6 $\beta$  (1:2000; Thermo Fisher Scientific Cat# PA1-722, RRID:AB\_2161443), mouse anti-acetylated  $\alpha$ -  
141 tubulin (1:1000; Santa Cruz Biotechnology Cat# sc-23950, RRID:AB\_628409), guinea pig anti-MAK  
142 (1:500; Wako, Cat# 012-26441, RRID:AB\_2827389), mouse anti-glutamylated tubulin (1:500; AdipoGen  
143 Cat# AG-20B-0020B, RRID:AB\_2490211), mouse anti-Ttc8 (1:1000; Santa Cruz Biotechnology Cat# sc-  
144 271009, RRID:AB\_10609492), rabbit anti-Ttc8 Exon 2A (1:1000; Peter Stoilov, West Virginia  
145 University, Cat# Anti-Bbs8 exon 2A, RRID:AB\_2827390), mouse anti-GAPDH (1:10,000; Fitzgerald  
146 Industries International Cat# 10R-G109a, RRID:AB\_1285808), and 4',6-diamidino-2-phenylindole  
147 (DAPI: nuclear counterstain; 1:1000; ThermoFisher, Waltham, MA).

#### 148 **Statistical analysis**

149 Unless otherwise stated, the data is presented as mean of at least three biological replicates with  
150 error bars representing the standard error of the mean. Statistical significance was determined by  
151 homoscedastic, two-tailed unpaired T-test.

152



## 153 **RESULTS**

### 154 **Validation of the conditional knockout mouse models**

155 We analyzed the expression of Musashi proteins in various tissues from adult mice. Out of all the  
156 tissues we tested, retina showed the highest expression of MSI1 and MSI2 proteins (Figure 1A), in line  
157 with the previously reported high transcript levels for *Msi1* and *Msi2* in rod photoreceptors (9). To test  
158 the biological significance of Musashi protein expression in the murine retina, we used *Cre-LoxP*  
159 conditional recombination to remove either *Msi1*, *Msi2*, or both the *Msi1* and *Msi2* genes throughout the  
160 entire retina and ventral forebrain using the *Six3 Cre* transgene (26). Throughout this work, we refer to  
161 *Musashi* floxed mice which are hemizygous for the *Six3 Cre* transgene as *ret-Msi*<sup>-/-</sup> mice. The conditional  
162 recombination results in the deletion of *Msi1*'s transcription start site, exon 1, and exon 2 (13). For *Msi2*,  
163 the transcription start site and the first four exons are removed after cre-mediated recombination (13). The  
164 ablation of MSI1 and MSI2 was confirmed by immunoblotting retinal lysates from knockout mice at  
165 postnatal day 10 (PN10) (Figure 1B). Immunofluorescence microscopy of retinal cross sections obtained  
166 from the knockout mice affirmed the absence of MSI1 and MSI2 expression in the retina (Figure 1C).

### 167 **The Musashi proteins are crucial for photoreceptor function**

168 To determine if the Musashi proteins are required for photoreceptor function, we performed  
169 electroretinographic (ERG) recordings of the *Musashi* conditional knockout mice at PN16 and monitored  
170 for changes in retinal function up to PN180. Figure 2A shows the representative scotopic and photopic  
171 ERG waveforms of the *ret-Msi1*<sup>-/-</sup>, *ret-Msi2*<sup>-/-</sup>, and *ret-Msi1*<sup>-/-</sup>:*Msi2*<sup>-/-</sup> mice at PN16 immediately after  
172 mice open their eyes (27). When both *Musashi* genes are removed, no scotopic or photopic response  
173 remains as shown by absence of conspicuous “a”-waves and “b”-waves (Figure 2A). However, significant  
174 photoreceptor function remains in the *ret-Msi1*<sup>-/-</sup> and *ret-Msi2*<sup>-/-</sup> single knockout mice. We characterized  
175 the photoreceptor function of the *ret-Msi1*<sup>-/-</sup> and *ret-Msi2*<sup>-/-</sup> mice further to see if there was a progressive  
176 loss of vision as the mice aged (Figure 2B-E). In *ret-Msi1*<sup>-/-</sup> mice, there was a statistically significant  
177 reduction in photoreceptor “a”-wave amplitudes at almost all light intensities (Figure 2B). This reduction  
178 in the photoreceptor “a”-wave amplitude was stationary and persisted in *ret-Msi1*<sup>-/-</sup> mice up to PN180

179 (Figure 2C). On the other hand, *ret-Msi2*<sup>-/-</sup> mice at PN16 had normal photoreceptor function at all the  
180 light intensities we tested (Figure 2D). The “a”-wave amplitude began to decrease progressively in *ret*-  
181 *Msi2*<sup>-/-</sup> mice as they aged, and this became significant at PN120 (Figure 2E).

182 The two Musashi protein share high degree of sequence similarity and are proposed to be  
183 functionally redundant, yet the progression of vision loss in the single *Msi1* and *Msi2* knockouts was  
184 significantly different. We tested if changes in expression levels of the two proteins after birth may  
185 account for this discrepancy. Western blot analysis of the Musashi protein expression levels in the retina  
186 between postnatal days 0 and 110, showed a distinct pattern of expression (Figure 3A and B). MSI1 levels  
187 spike by postnatal day 4 and remain high until P13-P16, a time frame that includes the period of  
188 photoreceptor outer segment morphogenesis (Figure 3A and B). After eye opening MSI1 protein  
189 expression declines (Figure 3A and B). MSI2 shows inverse pattern of protein expression to that of MSI1:  
190 relatively low levels after birth that gradually increase and peak after postnatal day 16 as the MSI1 protein  
191 levels decline (Figure 3A and B). Overall, our data shows that the Musashi proteins essential for  
192 photoreceptor function. The two proteins are functionally redundant, but appear to act at different time  
193 points of the retinal development.

#### 194 **Intrinsic expression of Musashi in photoreceptors is crucial for photoreceptor function**

195 We next sought to determine if the phenotype of the *ret-Msi*<sup>-/-</sup> mice was due to the absence of  
196 Musashi protein expression in photoreceptors or if deletion of Musashi in other retinal cell types or retinal  
197 progenitors were contributing to the loss of vision. To this end, we generated rod-specific *Musashi*  
198 conditional knockouts by crossing *Musashi* floxed mice with mice hemizygous for the *Nrl Cre* transgene  
199 where the *Nrl* promoter activates Cre expression in rod photoreceptors (28). Throughout this work, we  
200 refer to the *Musashi* floxed mice that are hemizygous for the *Nrl Cre* transgene as *rod-Msi*<sup>-/-</sup> mice. We  
201 used ERG to analyze the retinal function of the knockout mice after ablation of the *Musashi* genes in rods  
202 (Figure 4 A-E). Figure 4A shows the scotopic and photopic ERG waveforms of the *rod-Msi1*<sup>-/-</sup>, *rod*-  
203 *Msi2*<sup>-/-</sup>, and *rod-Msi1*<sup>-/-</sup>:*Msi2*<sup>-/-</sup> mice at PN16. As observed in the *ret-Msi1*<sup>-/-</sup>:*Msi2*<sup>-/-</sup> mice, no  
204 significant rod function was observed in the *rod-Msi1*<sup>-/-</sup>:*Msi2*<sup>-/-</sup> mice at PN16 which is demonstrated by

205 absence of conspicuous “a”-wave under scotopic testing conditions (Figure 4A). We examined the *rod-*  
206 *Msi1*<sup>-/-</sup> and *rod-Msi2*<sup>-/-</sup> single knockout mice to see if the photoreceptor phenotype was comparable to  
207 that obtained from the *ret-Msi1*<sup>-/-</sup> and *ret-Msi2*<sup>-/-</sup> mice. In *rod-Msi1*<sup>-/-</sup> mice at PN16, there was a  
208 reduction in photoreceptor “a”-wave amplitudes at multiple light intensities (Figure 4B). This reduction in  
209 “a”-wave amplitude persisted as these mice aged up to PN180 (Figure 4C). Contrarily, PN16 *rod-Msi2*<sup>-/-</sup>  
210 mice had no changes in photoreceptor function at all the light intensities examined (Figure 4D). As  
211 observed in the *ret-Msi2*<sup>-/-</sup> mice, the “a”-wave amplitude began to decrease progressively as these mice  
212 aged, and this decrease became statistically significant at PN90 (Figure 4E). The similar phenotypes of  
213 the *ret-Msi* and *rod-Msi* knockout mice shows that the intrinsic expression of Musashi proteins in  
214 photoreceptors is crucial for their function and that deletion of Musashi proteins in other cell types likely  
215 does not contribute significantly to the phenotype observed in the *ret-Msi*<sup>-/-</sup> mice. Therefore, throughout  
216 the rest of our studies, we focus on the *ret-Msi1*<sup>-/-</sup>:*Msi2*<sup>-/-</sup> mouse model for our experiments since there is  
217 a compensation in function occurring between MSI1 and MSI2 in the single knockout mice and to avoid  
218 confounding results that might be obtained when *Msi1* and *Msi2* are deleted only in rod but not cone  
219 photoreceptors.

## 220 **Progressive neuronal degeneration in the absence of the Musashi proteins**

221 We next wanted to examine the mechanism behind the photoreceptor dysfunction seen in the *ret-*  
222 *Msi1*<sup>-/-</sup>:*Msi2*<sup>-/-</sup> mouse model. One of the common causes of a reduced ERG is photoreceptor cell death.  
223 Therefore, we performed histological analysis of the *ret-Msi1*<sup>-/-</sup>:*Msi2*<sup>-/-</sup> mice at PN5, PN10, PN16, and  
224 PN180 (Figure 5A-D). In *ret-Msi1*<sup>-/-</sup>:*Msi2*<sup>-/-</sup> mice at PN5, even before the neural retina has completely  
225 differentiated, there is a reduction in the neuroblast layer (NBL) thickness which was quantified across  
226 the superior-inferior axis (Figure 5A, left and right panels). There is also a more disordered arrangement  
227 of NBL nuclei in *ret-Msi1*<sup>-/-</sup>:*Msi2*<sup>-/-</sup> mice with cells more tightly packed together compared to its  
228 littermate control (Figure 5A, left panel). At PN10, the outer nuclear layer (ONL), inner nuclear layer  
229 (INL), and ganglion cell layer (GCL) of the retina all form in *ret-Msi1*<sup>-/-</sup>:*Msi2*<sup>-/-</sup> mice but there is a  
230 reduction in the number of layers of photoreceptor nuclei (Figure 5B, left and right panels). At PN16, the

231 number of layers of ONL nuclei continue to decrease suggesting that photoreceptor cell death is occurring  
232 (Figure 5C, left and middle panels). However, at this age, there are no statistically significant changes in  
233 the number of layers of INL nuclei (Figure 5C, left and right panels). By 6 months of age, the retina of  
234 *ret-Msi1<sup>-/-</sup>:Msi2<sup>-/-</sup>* mice was severely degenerated with a complete loss of ONL nuclei in addition to a  
235 significant reduction in the number of layers of INL nuclei (Figure 5D, left, middle, and right panels).

### 236 **The Musashi proteins are crucial for photoreceptor outer segment and axoneme development**

237 Photoreceptor cells are present in the *ret-Msi1<sup>-/-</sup>:Msi2<sup>-/-</sup>* as indicated by the well-defined ONL  
238 (Figure 1C). We therefore examined the structure of the OS in *ret-Msi1<sup>-/-</sup>:Msi2<sup>-/-</sup>* mice at PN16 by  
239 immunofluorescence microscopy using three different OS markers, anti-Peripherin-2 (PRPH2: OS  
240 marker), anti-Phosphodiesterase-6 $\beta$  (PDE6 $\beta$ : rod OS marker), and peanut agglutinin (PNA: cone OS  
241 marker). After staining retinal cross sections from *ret-Msi1<sup>-/-</sup>:Msi2<sup>-/-</sup>* mice with PRPH2 and PNA, we  
242 observed a severe shortening of the photoreceptor outer segment (Figure 6A). This result was not limited  
243 to PRPH2, as staining with the rod OS marker PDE6 $\beta$  demonstrated the same phenotype (Figure 6B). The  
244 outer segment of cone photoreceptors also appears to be severely shortened as shown by the abnormal  
245 PNA staining (Figure 6A-B). Lastly, no mislocalization of PDE6 $\beta$  or PRPH2 is found in the ONL or inner  
246 segment of *ret-Msi1<sup>-/-</sup>:Msi2<sup>-/-</sup>* mice suggesting that while the Musashi proteins are required for outer  
247 segment formation they are not regulating trafficking or localization of OS-resident proteins (Figure 6B).

248 Using transmission electron microscopy, we imaged ultrathin retinal sections from *ret-Msi1<sup>-/-</sup>*  
249 *:Msi2<sup>-/-</sup>* mice at PN10 when the OS begins to elaborate. When examining the OS/IS boundary in *ret-*  
250 *Msi1<sup>-/-</sup>:Msi2<sup>-/-</sup>* mice by electron microscopy, we observed very little, if any, conspicuous OS (Figure  
251 6C). Instead, the IS of the *ret-Msi1<sup>-/-</sup>:Msi2<sup>-/-</sup>* mice appears to come in direct contact with the RPE  
252 (Figure 6C-D). At higher magnification, the photoreceptors of *ret-Msi1<sup>-/-</sup>:Msi2<sup>-/-</sup>* mice displayed either  
253 no OS or aberrant and undersized OS (Figure 6D left, middle, and right panels).

254 To examine the structure of the connecting cilium and the axoneme, we stained retinal cross  
255 sections from *ret-Msi1<sup>-/-</sup>:Msi2<sup>-/-</sup>* mice at PN10 using antibodies directed against the established markers  
256 of murine connecting cilium (glutamylated and acetylated tubulin) and axoneme (MAK) (29–32). Probing

257 with glutamylated and acetylated  $\alpha$ -tubulin antibodies showed that there were no changes in the length of  
258 the CC (Figure 7A, C-D). Contrarily, staining with the anti-MAK antibody showed a substantial reduction  
259 in the length of the axoneme accompanied with punctate staining suggesting a severe structural defect of  
260 the axoneme (Figure 7A-B).

### 261 **The Musashi proteins promote splicing of photoreceptor specific exons**

262 Our previous studies suggested that the Musashi proteins are regulating alternative splicing of  
263 their target pre-mRNAs in vertebrate photoreceptors (8). To test if the Musashi proteins are responsible  
264 for the inclusion of photoreceptor specific exon, we analyzed the splicing in *ret-Msi1<sup>-/-</sup>:Msi2<sup>-/-</sup>* mice of  
265 pre-mRNAs from cilia-and OS-related genes that we previously showed to express photoreceptor specific  
266 isoforms (Figure 8). We witnessed a drastic reduction in alternative exon inclusion in *ret-Msi1<sup>-/-</sup>:Msi2<sup>-/-</sup>*  
267 mice for all tested transcripts (Figure 8A). We also analyzed isoform expression at the protein level for  
268 TTC8 (Tetratricopeptide repeat domain 8) since we had an antibody that specifically recognizes the  
269 photoreceptor-specific isoform. TTC8 also referred as Bardet-Biedl Syndrome Protein (BBS8) is part of  
270 the BBSome complex that is known play an important role in photoreceptor outer segment  
271 morphogenesis (33, 34). We used two different antibodies, a pan-antibody that recognizes all TTC8  
272 protein isoforms (Pan-TTC8) and the other that recognizes the photoreceptor-specific isoform of Ttc8 by  
273 binding the epitope encoded by Exon 2A (the photoreceptor-specific exon of *Ttc8*) (Figure 8B). After  
274 probing retinal lysates from the *ret-Msi1<sup>-/-</sup>:Msi2<sup>-/-</sup>* mice with the pan-TTC8 antibody, we observed faster  
275 migration of the TTC8 protein compared to the littermate control suggesting that the Exon 2A was not  
276 included (Figure 8B). Concordantly, when probing for the photoreceptor-specific isoform of TTC8 using  
277 the Ttc8 Exon 2A antibody, we saw the absence of this isoform in *ret-Msi1<sup>-/-</sup>:Msi2<sup>-/-</sup>* mice (Figure 8B).  
278 Taken together, these results demonstrate that the Musashi proteins are required for the inclusion of  
279 photoreceptor specific alternative exons.

280

## 281 **DISCUSSION**

### 282 **MSI1 and MSI2 are required for photoreceptor morphogenesis but not specification**

283 Our data shows the requirement for MS11 and MS12 in photoreceptor cells. Double knockout of  
284 *Msi1* and *Msi2* in retinal progenitors results in complete loss of vision. Two lines of evidence demonstrate  
285 that this loss of vision is due to a defect in photoreceptor morphogenesis, rather than early developmental  
286 defects. First, the specification of retinal progenitors to photoreceptor cells was not affected by loss of  
287 Musashi. The retina of the knockout mice had laminated nuclear layers indicating normal development of  
288 the retina. The photoreceptor cells retained their characteristic morphology and expressed cell type  
289 specific proteins such as peripherin and PDE6. Importantly, removal of *Msi1* and *Msi2* in rod  
290 photoreceptors driven by *Nrl-Cre* caused loss of scotopic photoresponse. Thus, the vision phenotype is  
291 not due to impairment of the early stages of retinal development and is caused by a defect specific to  
292 photoreceptor cells.

293 Morphological examination by electron microscopy and immunofluorescence showed that the  
294 outer segment of the photoreceptors lacking Musashi is either missing or is stunted and disorganized. In  
295 addition, axoneme was shortened. In contrast, the connecting cilium has normal length and did not have  
296 obvious defects. Trafficking of PDE6 and peripherin through the connecting cilium also appears to be  
297 unaffected and the two proteins localize to the stunted outer segment wherever one is present. Taken  
298 together our findings demonstrates a requirement for Musashi in the morphogenesis and function of the  
299 photoreceptor outer segment that appears not to affect protein trafficking.

### 300 **Musashi is needed for inclusion of photoreceptor-specific exons**

301 RT-PCR analysis of alternative splicing in the retina of *Msi1* and *Msi2* knockout mice showed  
302 that inclusion of photoreceptor specific exons in the mature transcripts is dependent on the Musashi  
303 proteins. We confirmed this finding using immunoblotting with antibody that recognizes photoreceptor-  
304 specific isoform of TTC8. The effect of *Msi1* knockout on splicing is stronger compared to *Msi2*  
305 knockdown. It remains to be determined if this observation reflects a dominant role for MS11 in splicing  
306 control, or derives from the timing of the embryonic knockout of the two genes relative to the postnatal  
307 developmental switch from *Msi1* to *Msi2* expression in the retina. Our data demonstrates for the first time  
308 that Musashi regulates splicing *in vivo* and impacts dramatically the inclusion levels of the exons it

309 controls. This is a novel role for Musashi that is distinct from its known function in controlling translation  
310 in the cytosol.

### 311 **Functional redundancy and developmental switch within the Musashi protein family**

312 In vertebrates, the Musashi protein family consists of two paralogues, MSI1 and MSI2, which  
313 have high degree of sequence identity, and have arisen from a gene duplication event (35, 36). The RNA  
314 binding domains of MSI1 and MSI2 have approximately 90% sequence identity and recognize the same  
315 UAG sequence motif *in vitro* and *in vivo* (37–40). The high degree of similarity suggests that the two  
316 proteins are likely to be functionally redundant when co-expressed in the same cells. Indeed, we observed  
317 only minor reductions in visual function after the loss of either MSI1 or MSI2 alone whereas the  
318 combined loss of MSI1 and MSI2 resulted in a complete loss of visual function (Figure 2). Similarly,  
319 inclusion of photoreceptor specific exons is promoted by both proteins, and the double knockout produces  
320 stronger effect on splicing than the knockouts of either *Msi1* or *Msi2*. The functional redundancy in  
321 photoreceptor cells that we observe is in agreement with previous reports of redundancy between MSI1  
322 and MSI2 in other cell types (12, 13).

323 Despite the proposed functional redundancy between the two Musashi proteins the phenotype of  
324 the single *Msi1* and *Msi2* knockouts show distinct progression of vision loss. *Msi1* knockouts have  
325 reduced vision at birth, followed by minor decline as the animals age. This decline is unlikely to be  
326 associated with the lack of Musashi, as it tracks the normal reduction in visual response observed in the  
327 wild type controls. In contrast, *Msi2* knockouts do not show significant visual defect at the time of eye  
328 opening (P16), but their vision progressively deteriorates with age. This difference in the phenotypes can  
329 be explained by the developmental timing of the MSI1 and MSI2 protein expression. A burst in MSI1  
330 protein expression precedes the critical period for rod photoreceptor outer segment morphogenesis  
331 between birth and eye opening and MSI1 levels remain high until the eyes open at P16. The MSI1  
332 expression begins a gradual decline at P13 and the MSI1 protein is replaced by increase in MSI2 levels.  
333 This data shows distinct roles for MSI1 and MSI2 in photoreceptor morphogenesis and photoreceptor  
334 maintenance, respectively. The developmental switch we observe raises the question of potential

335 functional differences in the two Musashi protein, that require MSI1 expression during photoreceptor  
336 morphogenesis and MSI2 for photoreceptor maintenance.

337           Our work highlights roles for MSI1 and MSI2 in photoreceptor morphogenesis and survival. An  
338 interesting aspect of the function of the Musashi proteins in the retina is their apparently mutually  
339 exclusive roles at different stages of development. At early stages of development, MSI1 and MSI2  
340 support the renewal and proliferation of retinal precursor cells. At late stages of retinal development and  
341 in the adult retina MSI1 and MSI2 are required for morphogenesis of the differentiated photoreceptor  
342 cells and survival of mature neurons. Our studies point to the need for MSI in controlling the alternative  
343 splicing in photoreceptor cells. It is important to note that the canonical function of the Musashi proteins  
344 is to control mRNA translation in the cytosol (41, 42), where they can either block or enhance translation  
345 of mRNA depending on cellular context (43–48). Future studies will be aimed at determining the  
346 mechanism(s) for the need for Musashi in vision and the regulation of the developmental switch between  
347 MSI1 and MSI2.

348

349

350

351



352 **FUNDING**

353           This work was supported by the National Institutes of Health [grant numbers RO1 EY028035,  
354 R01 EY025536, and R21 EY027707]; the West Virginia Lions Club Foundation; and Lions Club  
355 International Foundation.

356

357 **AUTHOR CONTRIBUTIONS**

358           P.S. and V.R jointly conceived and supervised this study and edited the manuscript. J.S. designed  
359 and performed experiments and wrote the manuscript. F.M and B.J. designed and performed experiments.

360

361

362 **REFERENCES**

- 363 1. Grau-Bové, X., Ruiz-Trillo, I., and Irimia, M. (2018) Origin of exon skipping-rich transcriptomes in  
364 animals driven by evolution of gene architecture. *Genome Biol.* **19**, 135
- 365 2. Li, Y. I., Sanchez-Pulido, L., Haerty, W., and Ponting, C. P. (2014) RBFOX and PTBP1 proteins  
366 regulate the alternative splicing of micro-exons in human brain transcripts. *Genome Res.*  
367 10.1101/gr.181990.114
- 368 3. Irimia, M., Weatheritt, R. J., Ellis, J. D., Parikshak, N. N., Gonatopoulos-Pournatzis, T., Babor, M.,  
369 Quesnel-Vallièeres, M., Tapial, J., Raj, B., O’Hanlon, D., Barrios-Rodiles, M., Sternberg, M. J. E.,  
370 Cordes, S. P., Roth, F. P., Wrana, J. L., Geschwind, D. H., and Blencowe, B. J. (2014) A Highly  
371 Conserved Program of Neuronal Microexons Is Misregulated in Autistic Brains. *Cell.* **159**, 1511–  
372 1523
- 373 4. Jensen, K. B., Dredge, B. K., Stefani, G., Zhong, R., Buckanovich, R. J., Okano, H. J., Yang, Y. Y.  
374 L., and Darnell, R. B. (2000) Nova-1 Regulates Neuron-Specific Alternative Splicing and Is  
375 Essential for Neuronal Viability. *Neuron.* **25**, 359–371
- 376 5. Gehman, L. T., Stoilov, P., Maguire, J., Damianov, A., Lin, C.-H., Shiue, L., Ares, M., Mody, I.,  
377 and Black, D. L. (2011) The splicing regulator Rbfox1 (A2BP1) controls neuronal excitation in the  
378 mammalian brain. *Nat Genet.* **43**, 706–711
- 379 6. Ule, J., Ule, A., Spencer, J., Williams, A., Hu, J.-S., Cline, M., Wang, H., Clark, T., Fraser, C.,  
380 Ruggiu, M., Zeeberg, B. R., Kane, D., Weinstein, J. N., Blume, J., and Darnell, R. B. (2005) Nova  
381 regulates brain-specific splicing to shape the synapse. *Nat. Genet.* **37**, 844–852
- 382 7. Vuong, C. K., Wei, W., Lee, J.-A., Lin, C.-H., Damianov, A., de la Torre-Ubieta, L., Halabi, R.,  
383 Otis, K. O., Martin, K. C., O’Dell, T. J., and Black, D. L. (2018) Rbfox1 Regulates Synaptic  
384 Transmission Through the Inhibitory Neuron Specific vSNARE Vamp1. *Neuron.* **98**, 127-141.e7
- 385 8. Murphy, D., Cieply, B., Carstens, R., Ramamurthy, V., and Stoilov, P. (2016) The Musashi 1  
386 Controls the Splicing of Photoreceptor-Specific Exons in the Vertebrate Retina. *PLOS Genet.* **12**,  
387 e1006256
- 388 9. Ling, J. P., Wilks, C., Charles, R., Leavey, P. J., Ghosh, D., Jiang, L., Santiago, C. P., Pang, B.,  
389 Venkataraman, A., Clark, B. S., Nellore, A., Langmead, B., and Blackshaw, S. (2020) ASCOT  
390 identifies key regulators of neuronal subtype-specific splicing. *Nat. Commun.* **11**, 1–12
- 391 10. Ohyama, T., Nagata, T., Tsuda, K., Kobayashi, N., Imai, T., Okano, H., Yamazaki, T., and Katahira,  
392 M. (2012) Structure of Musashi1 in a complex with target RNA: the role of aromatic stacking  
393 interactions. *Nucleic Acids Res.* **40**, 3218–3231
- 394 11. Sakakibara, S., Nakamura, Y., Satoh, H., and Okano, H. (2001) RNA-Binding Protein Musashi2:  
395 Developmentally Regulated Expression in Neural Precursor Cells and Subpopulations of Neurons in  
396 Mammalian CNS. *J. Neurosci.* **21**, 8091–8107
- 397 12. Sakakibara, S., Nakamura, Y., Yoshida, T., Shibata, S., Koike, M., Takano, H., Ueda, S., Uchiyama,  
398 Y., Noda, T., and Okano, H. (2002) RNA-binding protein Musashi family: Roles for CNS stem cells  
399 and a subpopulation of ependymal cells revealed by targeted disruption and antisense ablation.  
400 *Proc. Natl. Acad. Sci.* **99**, 15194–15199
- 401 13. Li, N., Yousefi, M., Nakauka-Ddamba, A., Li, F., Vandivier, L., Parada, K., Woo, D.-H., Wang, S.,  
402 Naqvi, A. S., Rao, S., Tobias, J., Cedeno, R. J., Minuesa, G., Y, K., Barlowe, T. S., Valvezan, A.,  
403 Shankar, S., Deering, R. P., Klein, P. S., Jensen, S. T., Kharas, M. G., Gregory, B. D., Yu, Z., and  
404 Lengner, C. J. (2015) The Msi Family of RNA-Binding Proteins Function Redundantly as Intestinal  
405 Oncoproteins. *Cell Rep.* **13**, 2440–2455
- 406 14. Pearing, J. N., Salinas, R. Y., Baker, S. A., and Arshavsky, V. Y. (2013) Protein sorting, targeting  
407 and trafficking in photoreceptor cells. *Prog. Retin. Eye Res.* **36**, 24–51
- 408 15. Riazuddin, S. A., Iqbal, M., Wang, Y., Masuda, T., Chen, Y., Bowne, S., Sullivan, L. S., Waseem,  
409 N. H., Bhattacharya, S., Daiger, S. P., Zhang, K., Khan, S. N., Riazuddin, S., Hejtmancik, J. F.,  
410 Sieving, P. A., Zack, D. J., and Katsanis, N. (2010) A Splice-Site Mutation in a Retina-Specific  
411 Exon of BBS8 Causes Nonsyndromic Retinitis Pigmentosa. *Am. J. Hum. Genet.* **86**, 805–812

- 412 16. Murphy, D., Singh, R., Kolandaivelu, S., Ramamurthy, V., and Stoilov, P. (2015) Alternative  
413 Splicing Shapes the Phenotype of a Mutation in BBS8 To Cause Nonsyndromic Retinitis  
414 Pigmentosa. *Mol. Cell. Biol.* **35**, 1860–1870
- 415 17. Rachel, R. A., Li, T., and Swaroop, A. (2012) Photoreceptor sensory cilia and ciliopathies: focus on  
416 CEP290, RPGR and their interacting proteins. *Cilia*. **1**, 22
- 417 18. Veleri, S., Manjunath, S. H., Fariss, R. N., May-Simera, H., Brooks, M., Foskett, T. A., Gao, C.,  
418 Longo, T. A., Liu, P., Nagashima, K., Rachel, R. A., Li, T., Dong, L., and Swaroop, A. (2014)  
419 Ciliopathy-associated gene *Cc2d2a* promotes assembly of subdistal appendages on the mother  
420 centriole during cilia biogenesis. *Nat. Commun.* **5**, 1–12
- 421 19. Zacchigna, S., Oh, H., Wilsch-Bräuninger, M., Missol-Kolka, E., Jászai, J., Jansen, S., Tanimoto,  
422 N., Tonagel, F., Seeliger, M., Huttner, W. B., Corbeil, D., Dewerchin, M., Vinckier, S., Moons, L.,  
423 and Carmeliet, P. (2009) Loss of the Cholesterol-Binding Protein Prominin-1/CD133 Causes Disk  
424 Dymorphogenesis and Photoreceptor Degeneration. *J. Neurosci.* **29**, 2297–2308
- 425 20. Ba-Abbad, R., Arno, G., Carss, K., Stirrups, K., Penkett, C. J., Moore, A. T., Michaelides, M.,  
426 Raymond, F. L., Webster, A. R., and Holder, G. E. (2016) Mutations in *CACNA2D4* Cause  
427 Distinctive Retinal Dysfunction in Humans. *Ophthalmology*. **123**, 668–671.e2
- 428 21. Johnson, J., Freneau, R. T., Duncan, J. L., Rentería, R. C., Yang, H., Hua, Z., Liu, X., LaVail, M.  
429 M., Edwards, R. H., and Copenhagen, D. R. (2007) Vesicular Glutamate Transporter 1 Is Required  
430 for Photoreceptor Synaptic Signaling But Not For Intrinsic Visual Functions. *J. Neurosci.* **27**, 7245–  
431 7255
- 432 22. A simple polymerase chain reaction assay for genotyping the retinal degeneration mutation  
433 (*Pdebrd1*) in FVB/N-derived transgenic mice (2001) *Lab. Anim.* **35**, 153–156
- 434 23. Pak, J. S., Lee, E.-J., and Craft, C. M. (2015) The retinal phenotype of *Grk1*<sup>-/-</sup> is compromised by  
435 a *Crb1rd8* mutation. *Mol. Vis.* **21**, 1281–1294
- 436 24. Wright, Z. C., Singh, R. K., Alpino, R., Goldberg, A. F. X., Sokolov, M., and Ramamurthy, V.  
437 (2016) *ARL3* regulates trafficking of prenylated phototransduction proteins to the rod outer  
438 segment. *Hum. Mol. Genet.* **25**, 2031–2044
- 439 25. Wright, Z. C., Loskutov, Y., Murphy, D., Stoilov, P., Pugacheva, E., Goldberg, A. F. X., and  
440 Ramamurthy, V. (2018) ADP-Ribosylation Factor-Like 2 (*ARL2*) regulates cilia stability and  
441 development of outer segments in rod photoreceptor neurons. *Sci. Rep.* **8**, 1–12
- 442 26. Furuta, Y., Lagutin, O., Hogan, B. L. M., and Oliver, G. C. (2000) Retina- and ventral forebrain-  
443 specific Cre recombinase activity in transgenic mice. *genesis*. **26**, 130–132
- 444 27. Guan, W., Cao, J.-W., Liu, L.-Y., Zhao, Z.-H., Fu, Y., and Yu, Y.-C. (2017) Eye opening  
445 differentially modulates inhibitory synaptic transmission in the developing visual cortex. *eLife*. **6**,  
446 e32337
- 447 28. Brightman, D. S., Razafsky, D., Potter, C., Hodzic, D., and Chen, S. (2016) *Nrl*-Cre transgenic  
448 mouse mediates loxP recombination in developing rod photoreceptors. *Genes. N. Y. N 2000*. **54**,  
449 129–135
- 450 29. Dilan, T. L., Moye, A. R., Salido, E. M., Saravanan, T., Kolandaivelu, S., Goldberg, A. F. X., and  
451 Ramamurthy, V. (2019) *ARL13B*, a Joubert Syndrome-Associated Protein, Is Critical for  
452 Retinogenesis and Elaboration of Mouse Photoreceptor Outer Segments. *J. Neurosci.* **39**, 1347–  
453 1364
- 454 30. Arikawa, K., and Williams, D. S. (1993) Acetylated alpha-tubulin in the connecting cilium of  
455 developing rat photoreceptors. *Invest. Ophthalmol. Vis. Sci.* **34**, 2145–2149
- 456 31. Grau, M. B., Masson, C., Gadadhar, S., Rocha, C., Tort, O., Sousa, P. M., Vacher, S., Bieche, I.,  
457 and Janke, C. (2017) Alterations in the balance of tubulin glycylation and glutamylation in  
458 photoreceptors leads to retinal degeneration. *J. Cell Sci.* **130**, 938–949
- 459 32. Omori, Y., Chaya, T., Katoh, K., Kajimura, N., Sato, S., Muraoka, K., Ueno, S., Koyasu, T., Kondo,  
460 M., and Furukawa, T. (2010) Negative regulation of ciliary length by ciliary male germ cell-  
461 associated kinase (*Mak*) is required for retinal photoreceptor survival. *Proc. Natl. Acad. Sci.* **107**,  
462 22671–22676

- 463 33. Hsu, Y., Garrison, J. E., Kim, G., Schmitz, A. R., Searby, C. C., Zhang, Q., Datta, P., Nishimura, D.  
464 Y., Seo, S., and Sheffield, V. C. (2017) BBSome function is required for both the morphogenesis  
465 and maintenance of the photoreceptor outer segment. *PLoS Genet.* 10.1371/journal.pgen.1007057  
466 34. Dilan, T. L., Singh, R. K., Saravanan, T., Moye, A., Goldberg, A. F. X., Stoilov, P., and  
467 Ramamurthy, V. (2018) Bardet–Biedl syndrome-8 (BBS8) protein is crucial for the development of  
468 outer segments in photoreceptor neurons. *Hum. Mol. Genet.* **27**, 283–294  
469 35. Ohyama, T., Nagata, T., Tsuda, K., Kobayashi, N., Imai, T., Okano, H., Yamazaki, T., and Katahira,  
470 M. (2012) Structure of Musashi1 in a complex with target RNA: the role of aromatic stacking  
471 interactions. *Nucleic Acids Res.* **40**, 3218–3231  
472 36. Sutherland, J. M., Siddall, N. A., Hime, G. R., and McLaughlin, E. A. (2015) RNA binding proteins  
473 in spermatogenesis: an in depth focus on the Musashi family. *Asian J. Androl.* **17**, 529–536  
474 37. Uren, P. J., Vo, D. T., Araujo, P. R. de, Pötschke, R., Burns, S. C., Bahrami-Samani, E., Qiao, M.,  
475 Abreu, R. de S., Nakaya, H. I., Correa, B. R., Kühnöl, C., Ule, J., Martindale, J. L., Abdelmohsen,  
476 K., Gorospe, M., Smith, A. D., and Penalva, L. O. F. (2015) RNA-Binding Protein Musashi1 Is a  
477 Central Regulator of Adhesion Pathways in Glioblastoma. *Mol. Cell. Biol.* **35**, 2965–2978  
478 38. Bennett, C. G., Riemondy, K., Chapnick, D. A., Bunker, E., Liu, X., Kuersten, S., and Yi, R. (2016)  
479 Genome-wide analysis of Musashi-2 targets reveals novel functions in governing epithelial cell  
480 migration. *Nucleic Acids Res.* **44**, 3788–3800  
481 39. Rentas, S., Holzapfel, N. T., Belew, M. S., Pratt, G. A., Voisin, V., Wilhelm, B. T., Bader, G. D.,  
482 Yeo, G. W., and Hope, K. J. (2016) Musashi-2 attenuates AHR signalling to expand human  
483 haematopoietic stem cells. *Nature.* **532**, 508–511  
484 40. Lan, L., Xing, M., Douglas, J. T., Gao, P., Hanzlik, R. P., and Xu, L. (2017) Human oncoprotein  
485 Musashi-2 N-terminal RNA recognition motif backbone assignment and identification of RNA-  
486 binding pocket. *Oncotarget.* **8**, 106587–106597  
487 41. Kudinov, A. E., Karanicolas, J., Golemis, E. A., and Bumber, Y. (2017) Musashi RNA-Binding  
488 Proteins as Cancer Drivers and Novel Therapeutic Targets. *Clin. Cancer Res.* **23**, 2143–2153  
489 42. Fox, R. G., Park, F. D., Koechlein, C. S., Kritzik, M., and Reya, T. (2015) Musashi Signaling in  
490 Stem Cells and Cancer. *Annu. Rev. Cell Dev. Biol.* **31**, 249–267  
491 43. Imai, T., Tokunaga, A., Yoshida, T., Hashimoto, M., Mikoshiba, K., Weinmaster, G., Nakafuku,  
492 M., and Okano, H. (2001) The Neural RNA-Binding Protein Musashi1 Translationally Regulates  
493 Mammalian numb Gene Expression by Interacting with Its mRNA. *Mol. Cell. Biol.* **21**, 3888–3900  
494 44. Battelli, C., Nikopoulos, G. N., Mitchell, J. G., and Verdi, J. M. (2006) The RNA-binding protein  
495 Musashi-1 regulates neural development through the translational repression of p21WAF-1. *Mol.*  
496 *Cell. Neurosci.* **31**, 85–96  
497 45. Ma, X., Tian, Y., Song, Y., Shi, J., Xu, J., Xiong, K., Li, J., Xu, W., Zhao, Y., Shuai, J., Chen, L.,  
498 Plikus, M. V., Lengner, C. J., Ren, F., Xue, L., and Yu, Z. (2017) Msi2 Maintains Quiescent State  
499 of Hair Follicle Stem Cells by Directly Repressing the Hh Signaling Pathway. *J. Invest. Dermatol.*  
500 **137**, 1015–1024  
501 46. Cragle, C., and MacNicol, A. M. (2014) Musashi Protein-directed Translational Activation of  
502 Target mRNAs Is Mediated by the Poly(A) Polymerase, Germ Line Development Defective-2. *J.*  
503 *Biol. Chem.* **289**, 14239–14251  
504 47. Rutledge, C. E., Lau, H.-T., Mangan, H., Hardy, L. L., Sunnotel, O., Guo, F., MacNicol, A. M.,  
505 Walsh, C. P., and Lees-Murdock, D. J. (2014) Efficient Translation of Dnmt1 Requires Cytoplasmic  
506 Polyadenylation and Musashi Binding Elements. *PLOS ONE.* **9**, e88385  
507 48. MacNicol, M. C., Cragle, C. E., McDaniel, F. K., Hardy, L. L., Wang, Y., Arumugam, K.,  
508 Rahmatallah, Y., Glazko, G. V., Wilczynska, A., Childs, G. V., Zhou, D., and MacNicol, A. M.  
509 (2017) Evasion of regulatory phosphorylation by an alternatively spliced isoform of Musashi2. *Sci.*  
510 *Rep.* **7**, 1–17  
511

512



514 **FIGURE 1**

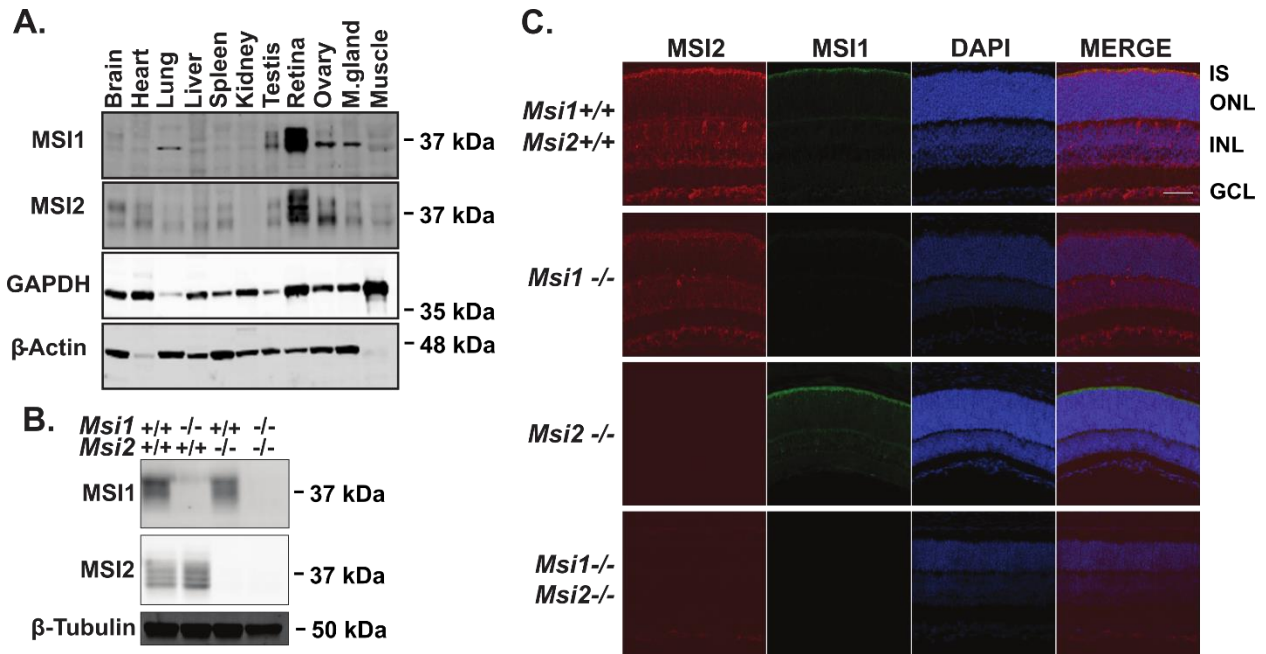

515

516

517

518 **FIGURE 2**

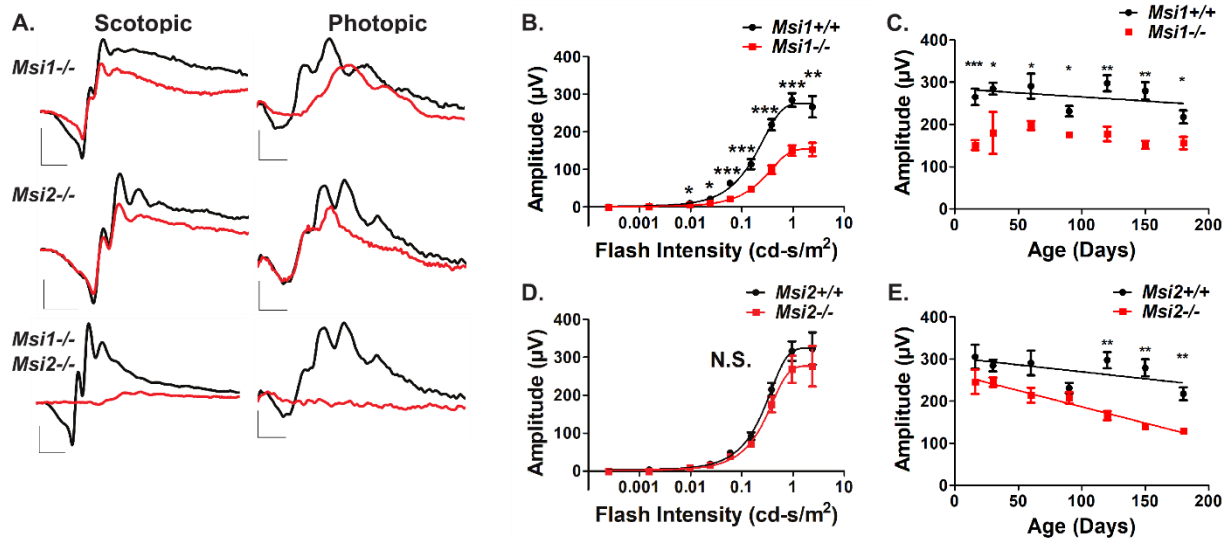

519

520

521

522

523 **FIGURE 3**

524

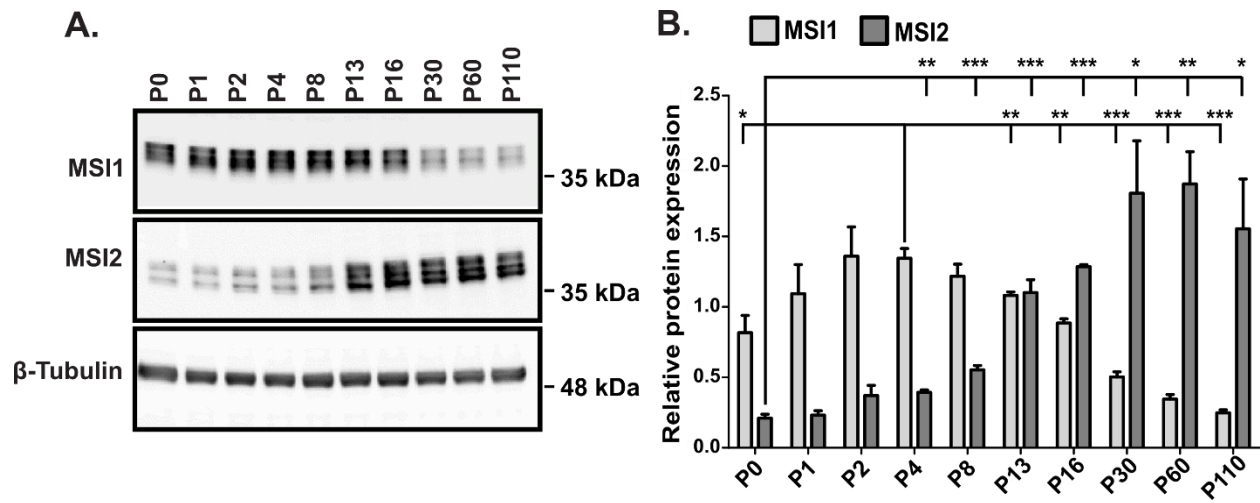

525

526

527



528 **FIGURE 4**

529

530

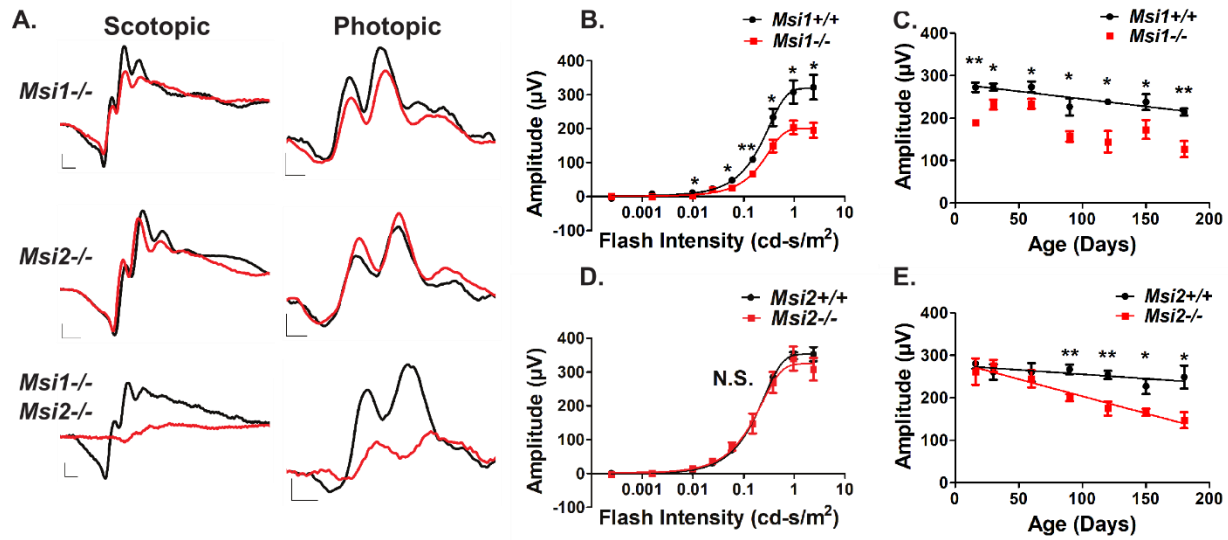

531

532

533

534 **FIGURE 5**

535

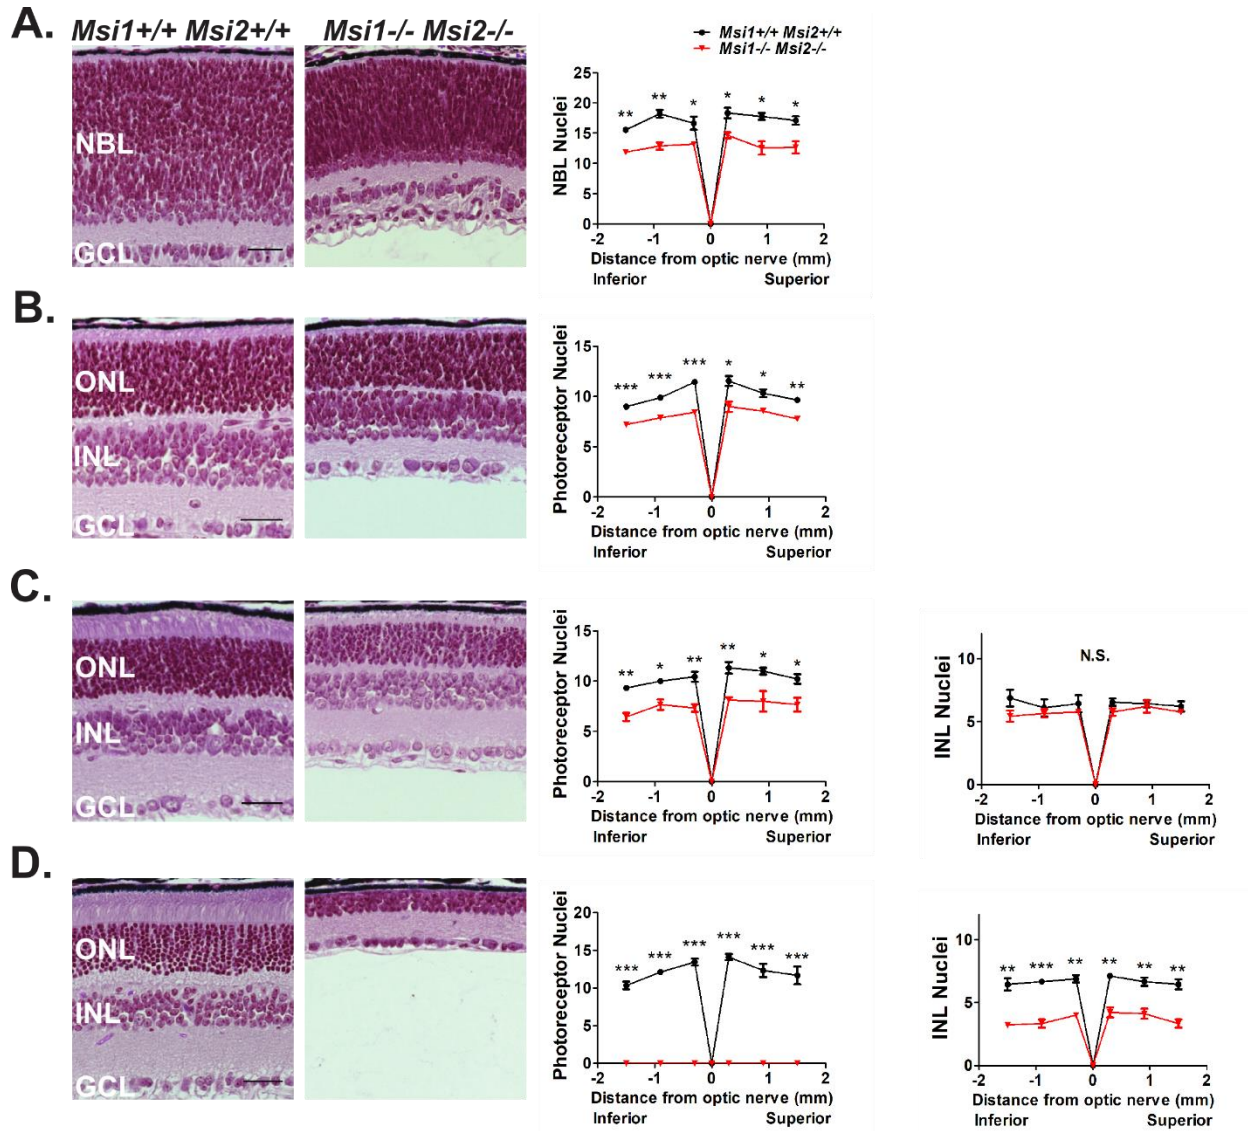

536

537

538

539 **FIGURE 6**

540

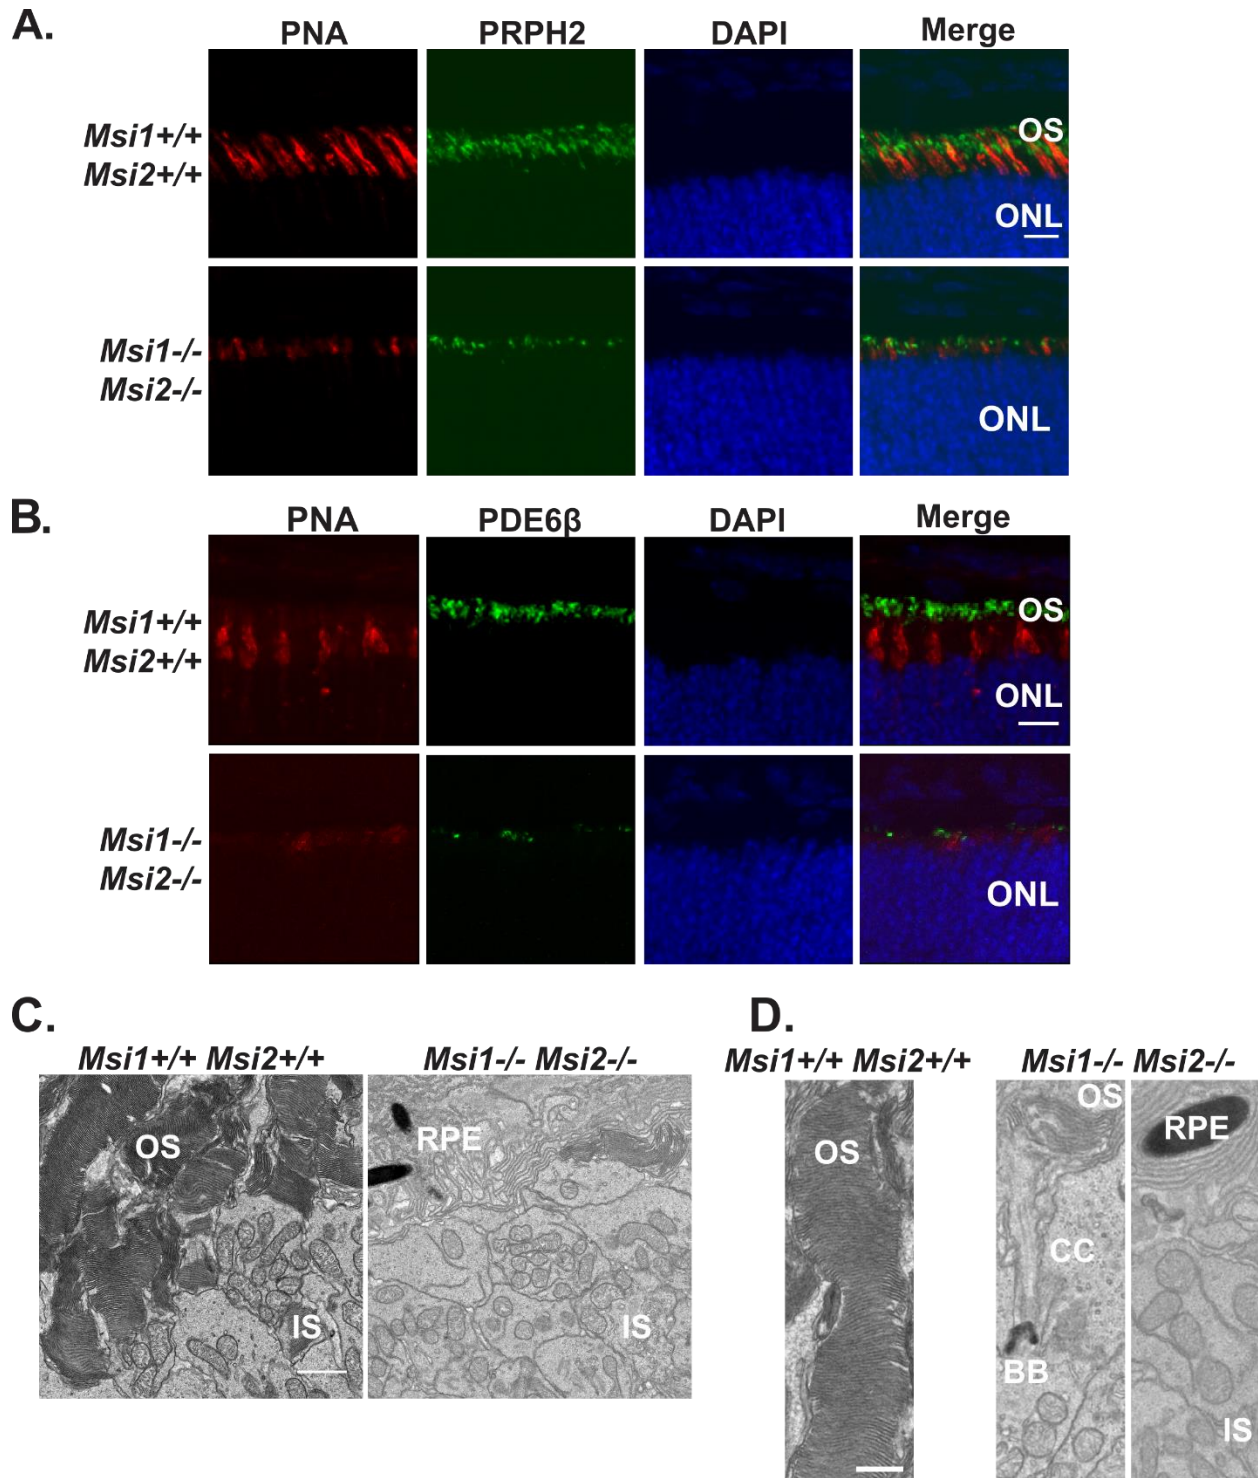

541

542

543 **FIGURE 7**

544

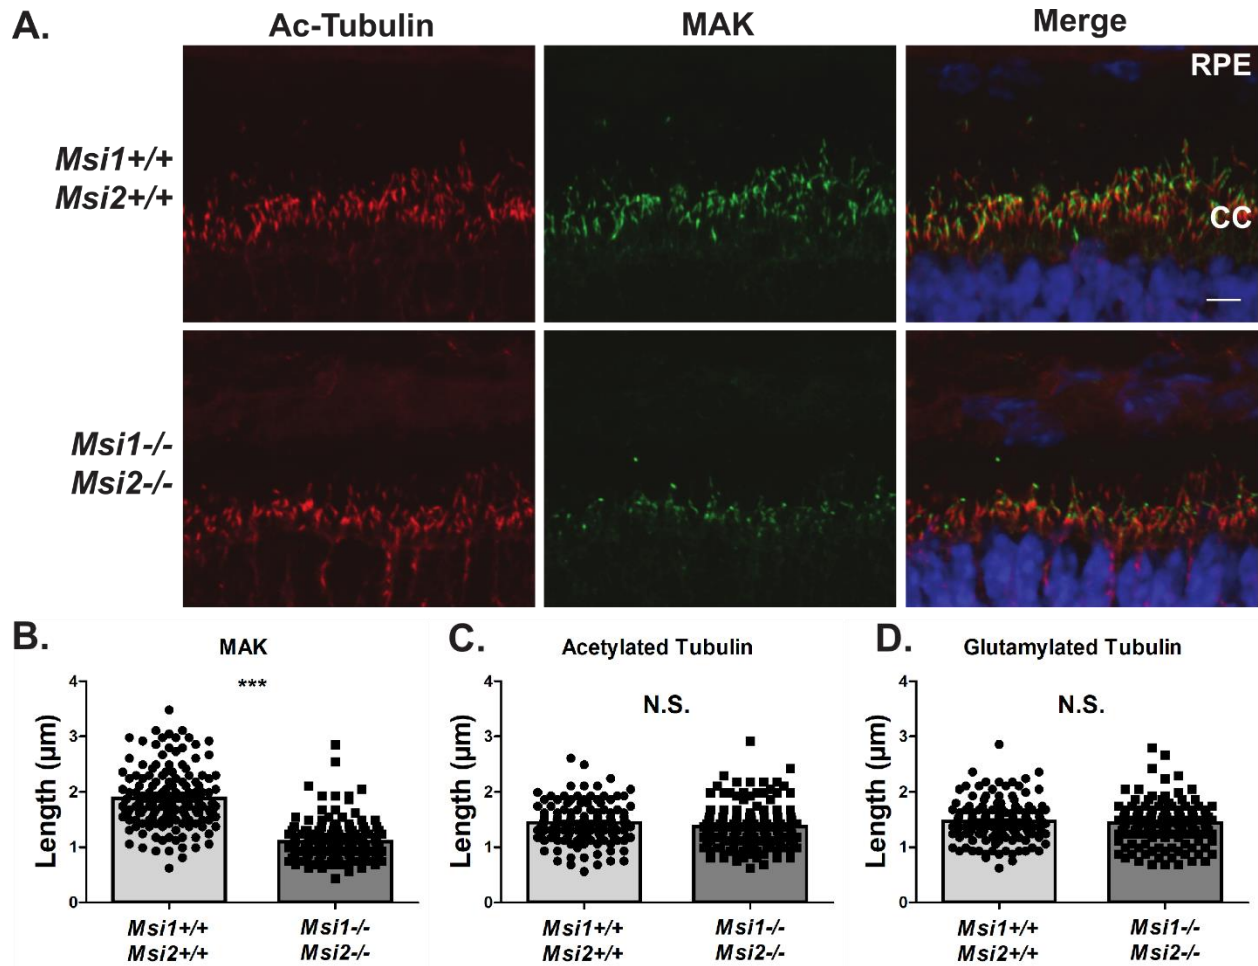

545

546

547

548 **FIGURE 8**

549

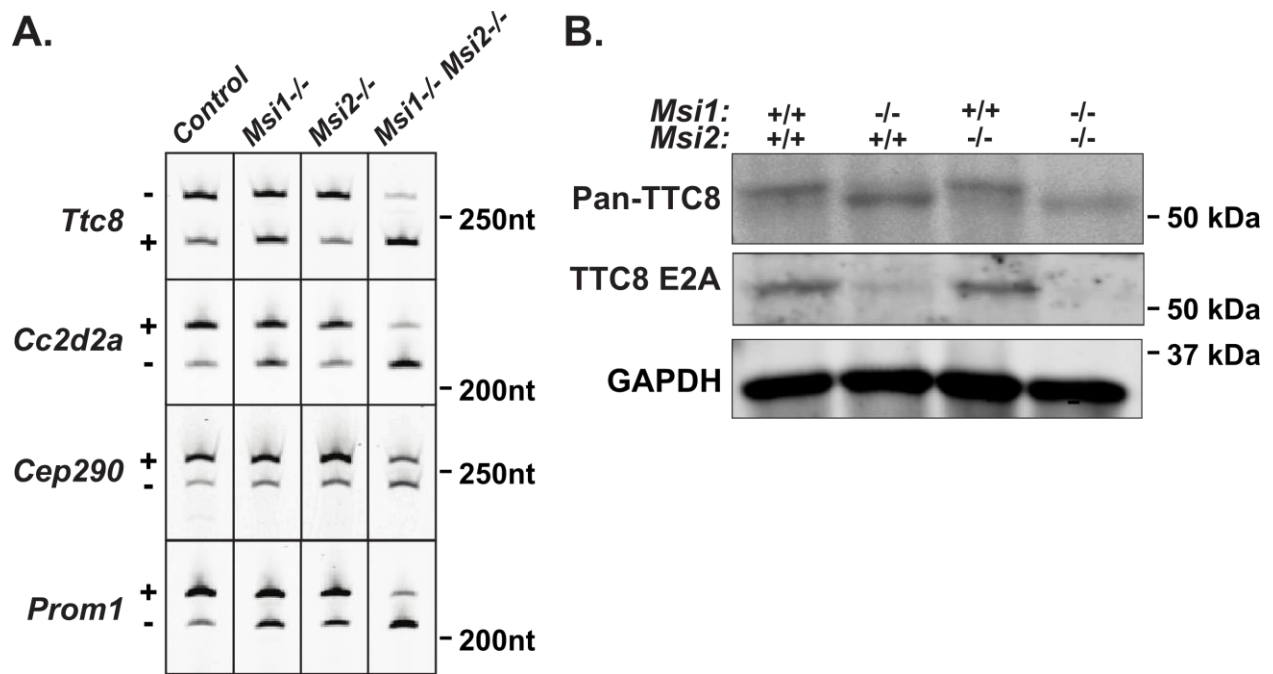

550

551

552

553

554

555

556 **FIGURE LEGENDS**

557

558 **Figure 1: Conditional Musashi knockout mouse models.**

559 **A.** Immunoblot of indicated tissues from adult wildtype mice probed with MSI1 and MSI2 antibodies.

560 GAPDH and  $\beta$ -Actin serve as a loading control.

561 **B.** Western blot analyses of Musashi in retinal lysates from *ret-Msi1*<sup>-/-</sup>, *ret-Msi2*<sup>-/-</sup>, and *ret-Msi1*<sup>-/-</sup>:

562 *Msi2*<sup>-/-</sup> mice at PN10.  $\beta$ -tubulin levels provide a loading control.

563 **C.** Retinal sections from *ret-Msi1*<sup>-/-</sup>, *ret-Msi2*<sup>-/-</sup>, and *ret-Msi1*<sup>-/-</sup>: *Msi2*<sup>-/-</sup> mice at PN10 probed with

564 MSI1 (Green) and MSI2 (Red) antibodies along with a DAPI nuclear counterstain (Blue). (IS: inner

565 segment, ONL: outer nuclear layer, INL: inner nuclear layer, and GCL: ganglion cell layer). Scale bar =

566 50  $\mu$ m.

567

568 **Figure 2: The Musashi proteins are crucial for normal visual response.**

569 **A.** Representative scotopic and photopic electroretinograms (ERGs) from the *ret-Msi1*<sup>-/-</sup>, *ret-Msi2*<sup>-/-</sup>, and

570 *ret-Msi1*<sup>-/-</sup>: *Msi2*<sup>-/-</sup> mice at PN16. Scotopic ERGs were obtained after overnight dark adaptation using

571 0.151 cd-s/m<sup>2</sup> flashes while photopic ERGs were obtained with 7.6 cd-s/m<sup>2</sup> flashes under light-adapted

572 conditions using a rod-saturating white background light (Scotopic scale bar: x-axis = 20ms, y-axis = 200

573  $\mu$ V; Photopic scale bar: x-axis = 20ms, y-axis = 20  $\mu$ V).

574 **B.** Intensity-response plot of the scotopic “a”-wave response from *ret-Msi1*<sup>-/-</sup> mice (\*=P-value < 0.05;

575 \*\*=P-value < 0.01; \*\*\*=P-value < 0.001).

576 **C.** Plot of the rod photoreceptor “a”-wave response from *ret-Msi1*<sup>-/-</sup> mice against the age of the mouse

577 during which the ERG was recorded.

578 **D.** Intensity-response curve of the scotopic “a”-wave response from *ret-Msi2*<sup>-/-</sup> mice (\*=P-value < 0.05;

579 \*\*=P-value < 0.01; \*\*\*=P-value < 0.001).

580 **E.** Plot of the rod photoreceptor “a”-wave response from *ret-Msi2*<sup>-/-</sup> mice plotted against the age of the

581 mouse during which the ERG was recorded. All data is shown as the mean  $\pm$  the SEM, and statistical

582 analyses were carried out using the homoscedastic unpaired student's t-test (\*=P-value<0.05).

583

584 **Figure 3: Developmental switch in expression of MSI 1 and 2.**

585 **A.** Representative immunoblot showing the expression of MSI1 and 2 in retinal tissues at indicated ages  
586 (P0-P110). Equal amount of total protein (20 µg) were loaded in each lane. β-tubulin serves as the loading  
587 control.

588 **B.** Quantification of immunoblots shown in Panel A (n=3). All data is shown as the mean ± the SEM, and  
589 statistical analyses were carried out using the homoscedastic unpaired student's t-test (\*=P-value < 0.05;  
590 \*\*=P-value < 0.01; \*\*\*=P-value < 0.001). T-test for *Msi1* compared expression levels to the peak  
591 expression at P4. T-test for *Msi2* compared expression levels to the expression at P0.

592 **Figure 4: Rod cell specific defect of the double *Msi1* and *Msi2* knockout.**

593 **A.** Representative scotopic and photopic electroretinograms (ERGs) from the *rod-Msi1*<sup>-/-</sup>, *rod-Msi2*<sup>-/-</sup>,  
594 and *rod-Msi1*<sup>-/-</sup>; *Msi2*<sup>-/-</sup> mice at PN16. Scotopic ERGs were obtained after overnight dark adaptation  
595 using 0.151 cd-s/m<sup>2</sup> flashes while photopic ERGs were obtained with 7.6 cd-s/m<sup>2</sup> flashes under light-  
596 adapted conditions using a rod-saturating white background light (Scotopic scale bar: x-axis = 10ms, y-  
597 axis = 100 µV; Photopic scale bar: x-axis = 10ms, y-axis = 20 µV).

598 **B.** Intensity response plot of the scotopic “a”-wave from *rod-Msi1*<sup>-/-</sup> mice (\*=P-value < 0.05; \*\*=P-value  
599 < 0.01; \*\*\*=P-value < 0.001).

600 **C.** Plot of the rod photoreceptor “a”-wave response from *rod-Msi1*<sup>-/-</sup> mice against the age of the mouse  
601 during which the ERG was recorded.

602 **D.** Intensity response plot of the scotopic “a”-wave response from *rod-Msi2*<sup>-/-</sup> mice (\*=P-value < 0.05;  
603 \*\*=P-value < 0.01; \*\*\*=P-value < 0.001).

604 **E.** Plot of the rod photoreceptor “a”-wave response from *rod-Msi2*<sup>-/-</sup> mice against the age of the mouse  
605 during which the ERG was recorded. All data is shown as the mean ± the SEM, and statistical analyses  
606 were carried out using the homoscedastic unpaired student's t-test (\*=P<0.05).



607

608 **Figure 5: Retinal cell death occurs in the absence of the Musashi proteins**

609 Left: Brightfield microscopic images of H&E stained retinal cross sections from the *ret-Msi1*<sup>-/-</sup>: *Msi2*<sup>-/-</sup>  
610 mice at PN5 (A), PN10 (B), PN16 (C), and PN180 (D).

611 Right: Spider plot of the indicated layer thickness at six regions from the inferior to superior retina in the  
612 *ret-Msi1*<sup>-/-</sup>: *Msi2*<sup>-/-</sup> mice at PN5 (A), PN10 (B), PN16 (C), and PN180 (D) (NBL: neuroblast layer, ONL:  
613 outer nuclear layer, INL: inner nuclear layer, and GCL: ganglion cell layer).

614 All data is shown as the mean  $\pm$  the SEM, and statistical analyses were carried out using the  
615 homoscedastic unpaired student's t-test (\*=P-value < 0.05; \*\*=P-value < 0.01; \*\*\*=P-value < 0.001).

616 **Figure 6: Abnormal development of OS in the absence of MSI1 and MSI2**

617 **A.** Immunofluorescence microscopy images of retinal cross sections from the *ret-Msi1*<sup>-/-</sup>: *Msi2*<sup>-/-</sup> mice at  
618 PN10 stained with anti-peripherin-2 antibody (PRPH2: OS marker - Green) and peanut agglutinin (PNA:  
619 cone OS marker - Red) along with a DAPI nuclear counterstain (Blue). Scale bar = 20  $\mu$ m.

620 **B.** Immunofluorescence microscopy images of retinal cross sections from the *ret-Msi1*<sup>-/-</sup>: *Msi2*<sup>-/-</sup> mice at  
621 PN10 stained with anti-phosphodiesterase-6 $\beta$  antibody (PDE6 $\beta$ : rod OS marker - Green) and peanut  
622 agglutinin (PNA: cone OS marker - Red) along with a DAPI counterstain (Blue). (OS: outer segment and  
623 ONL: outer nuclear layer). Scale bar = 20  $\mu$ m.

624 **C.** Low magnification transmission electron microscopy images of ultrathin retinal sections from *ret*-  
625 *Msi1*<sup>-/-</sup>: *Msi2*<sup>-/-</sup> mice at PN10 visualizing the boundary between the OS and IS showing the lack of  
626 typical outer segments in the absence of the Musashi proteins (OS: outer segment, IS: inner segment, and  
627 RPE: retinal pigment epithelium). Scale bar = 2  $\mu$ m.

628 **D.** High magnification transmission electron microscopy images of ultrathin retinal sections from *ret*-  
629 *Msi1*<sup>-/-</sup>: *Msi2*<sup>-/-</sup> mice at PN10 visualizing the boundary between the OS and IS showing that the OS  
630 either does not form (far right) or is dysmorphic (middle) in the absence of the Musashi proteins (OS:  
631 outer segment, CC: connecting cilium, BB: basal body, RPE: retinal pigment epithelium, and IS: inner  
632 segment). Scale bar = 1  $\mu$ m.

633

634 **Figure 7: The Musashi proteins are crucial for photoreceptor axoneme development**

635 **A.** Immunofluorescence microscopy images of retinal cross sections from the *ret-Msi1*<sup>-/-</sup>; *Msi2*<sup>-/-</sup> mice at

636 PN10 stained with acetylated-  $\alpha$ -tubulin antibody (Ac-Tubulin: Red) and male germ cell-associated

637 kinase antibody (MAK: Green) along with DAPI counterstain (Blue) (RPE: retinal pigment epithelium,

638 CC: connecting cilium, and ONL: outer nuclear layer).

639 Scatter bar plot showing the distribution of length measurements for the photoreceptor axoneme by MAK

640 staining (**B**) and connecting cilium by Ac-tubulin staining (**C**) and glutamylated tubulin staining (**D**).

641 Retinal sections were obtained from PN10 musashi knockouts and littermate controls.

642

643 **Figure 8: The Musashi proteins regulate alternative splicing of their target transcripts**

644 **A.** Reverse transcriptase PCR splicing assay using total RNA purified from retinal lysates of *ret-Msi1*<sup>-/-</sup>,

645 *ret-Msi2*<sup>-/-</sup>, and *ret-Msi1*<sup>-/-</sup>; *Msi2*<sup>-/-</sup> mice. *Ttc8*, *Cc2d2a*, *Cep290*, and *Prom1* are four cilia- and OS-

646 related transcripts shown to have reduced photoreceptor-specific exon inclusion in the absence of MSI1

647 and MSI2.

648 **B.** Immunoblot of retinal lysates from *ret-Msi1*<sup>-/-</sup>, *ret-Msi2*<sup>-/-</sup>, and *ret-Msi1*<sup>-/-</sup>; *Msi2*<sup>-/-</sup> mice. After

649 probing with the pan-TTC8 antibody (top), a change in the migration of the TTC8 protein is observed in

650 the absence of MSI1 and MSI2 suggesting that the peptide encoded by Exon 2A was not included. When

651 probing with the TTC8 E2A antibody (middle), photoreceptor-specific isoform of TTC8 was not

652 observed in the absence of MSI1 and MSI2.

653

654
